# Supplementary material
Source: ML conference proceedings conference paper supplement (https://aclanthology.org/2024.emnlp-main.621)
Supplement: software [file 2024.emnlp-main.621.software.zip]

## Sheet: Sheet1
model1	model2	pure_incon_rate	eqaulsplit_incon_rate	IBMsplit_incon_rate	EqualIBMsplit_incon_rate	equalsplit_fix_rate	IBMsplit_fix_rate	EqualIBMsplit_fix_rate
gpt-3.5-turbo	claude-v1	0.725	0.6875	0.6625	0.575	0.206897	0.293103	0.327586
llama-13b	vicuna-13b	0.2375	0.2125	0.2125	0.175	0.526316	0.578947	0.631579
alpaca-13b	vicuna-13b	0.4875	0.2875	0.2625	0.1875	0.487179	0.564103	0.641026
gpt-3.5-turbo	gpt-4	0.6125	0.6625	0.5625	0.45	0.204082	0.265306	0.408163
gpt-4	claude-v1	0.8625	0.8	0.775	0.7375	0.130435	0.15942	0.188406
vicuna-13b	vicuna-7b	0.8	0.75	0.75	0.675	0.140625	0.140625	0.21875
vicuna-7b	alpaca-13b	0.5	0.275	0.3	0.2125	0.65	0.55	0.675
gpt-4	vicuna-13b	0.6375	0.725	0.6125	0.6	0.176471	0.254902	0.27451
