# Supplementary material
Source: ML conference proceedings conference paper supplement (https://aclanthology.org/2024.emnlp-main.621)
Supplement: software [file output_chatglm_version_likert_temp_0.xlsx]

## Sheet: Sheet1
model1	model2	pure_incon_rate	eqaulsplit_incon_rate	IBMsplit_incon_rate	EqualIBMsplit_incon_rate	equalsplit_fix_rate	IBMsplit_fix_rate	EqualIBMsplit_fix_rate
gpt-3.5-turbo	claude-v1	0.7625	0.6	0.55	0.3625	0.360656	0.491803	0.622951
llama-13b	vicuna-13b	0.65	0.65	0.525	0.3625	0.288462	0.480769	0.596154
alpaca-13b	vicuna-13b	0.675	0.5375	0.5375	0.2875	0.425926	0.388889	0.666667
gpt-3.5-turbo	gpt-4	0.8	0.6375	0.4875	0.3	0.375	0.4375	0.625
gpt-4	claude-v1	0.7625	0.6625	0.475	0.3	0.278689	0.459016	0.622951
vicuna-13b	vicuna-7b	0.7125	0.6125	0.5625	0.3625	0.315789	0.368421	0.526316
vicuna-7b	alpaca-13b	0.7375	0.7	0.65	0.5125	0.271186	0.40678	0.508475
gpt-4	vicuna-13b	0.7625	0.6125	0.575	0.375	0.377049	0.459016	0.655738
