# Supplementary material
Source: ML conference proceedings conference paper supplement (https://aclanthology.org/2024.emnlp-main.621)
Supplement: software [file output_chatglm_version_new_temp_0.xlsx]

## Sheet: Sheet1
model1	model2	pure_incon_rate	eqaulsplit_incon_rate	IBMsplit_incon_rate	EqualIBMsplit_incon_rate	equalsplit_fix_rate	IBMsplit_fix_rate	EqualIBMsplit_fix_rate
gpt-3.5-turbo	claude-v1	0.5125	0.7	0.6	0.45	0.292683	0.439024	0.560976
llama-13b	vicuna-13b	0.575	0.525	0.5875	0.3375	0.413043	0.391304	0.630435
alpaca-13b	vicuna-13b	0.7	0.6	0.5375	0.35	0.392857	0.357143	0.589286
gpt-3.5-turbo	gpt-4	0.5625	0.5875	0.6625	0.4	0.311111	0.311111	0.488889
gpt-4	claude-v1	0.625	0.4875	0.7	0.3375	0.44	0.26	0.58
vicuna-13b	vicuna-7b	0.7	0.5375	0.75	0.3875	0.392857	0.178571	0.517857
vicuna-7b	alpaca-13b	0.7125	0.6	0.625	0.4	0.368421	0.333333	0.561404
gpt-4	vicuna-13b	0.5375	0.575	0.7	0.4	0.372093	0.255814	0.55814
