# Supplementary material
Source: ML conference proceedings conference paper supplement (https://aclanthology.org/2024.emnlp-main.621)
Supplement: software [file output_chatglm_version_old_temp_0.xlsx]

## Sheet: Sheet1
model1	model2	pure_incon_rate	eqaulsplit_incon_rate	IBMsplit_incon_rate	EqualIBMsplit_incon_rate	equalsplit_fix_rate	IBMsplit_fix_rate	EqualIBMsplit_fix_rate
gpt-3.5-turbo	claude-v1	0.425	0.525	0.45	0.2	0.352941	0.411765	0.647059
llama-13b	vicuna-13b	0.3875	0.5	0.3625	0.2125	0.290323	0.258065	0.419355
alpaca-13b	vicuna-13b	0.3375	0.575	0.4875	0.2625	0.222222	0.296296	0.518519
gpt-3.5-turbo	gpt-4	0.375	0.5625	0.575	0.2875	0.233333	0.3	0.5
gpt-4	claude-v1	0.4875	0.6	0.4875	0.3125	0.205128	0.282051	0.410256
vicuna-13b	vicuna-7b	0.4375	0.55	0.525	0.275	0.285714	0.228571	0.514286
vicuna-7b	alpaca-13b	0.375	0.5625	0.4125	0.2375	0.3	0.4	0.533333
gpt-4	vicuna-13b	0.4875	0.5625	0.5125	0.2875	0.282051	0.282051	0.538462
