# Supplementary material
Source: ML conference proceedings conference paper supplement (https://aclanthology.org/2024.emnlp-main.621)
Supplement: software [file output_claude2_version_likert_temp_0.xlsx]

## Sheet: Sheet1
model1	model2	pure_incon_rate	eqaulsplit_incon_rate	IBMsplit_incon_rate	EqualIBMsplit_incon_rate	equalsplit_fix_rate	IBMsplit_fix_rate	EqualIBMsplit_fix_rate
gpt-3.5-turbo	claude-v1	0.5625	0.0625	0.1625	0.025	0.377778	0.844444	0.866667
llama-13b	vicuna-13b	0.3125	0.0375	0.0375	0.0125	0.92	0.92	0.96
alpaca-13b	vicuna-13b	0.325	0.1375	0.0625	0.0375	0.807692	0.653846	0.961538
gpt-3.5-turbo	gpt-4	0.525	0.2	0.2125	0.1	0.738095	0.714286	0.833333
gpt-4	claude-v1	0.7125	0.1375	0.25	0.075	0.842105	0.684211	0.912281
vicuna-13b	vicuna-7b	0.5875	0.175	0.2125	0.0375	0.851064	0.723404	0.957447
vicuna-7b	alpaca-13b	0.3875	0.1	0.075	0.05	0.83871	0.870968	0.903226
gpt-4	vicuna-13b	0.5375	0.1625	0.175	0.075	0.813953	0.790698	0.906977
