# Supplementary material
Source: ML conference proceedings conference paper supplement (https://aclanthology.org/2024.emnlp-main.621)
Supplement: software [file output_claude2_version_new_temp_0.xlsx]

## Sheet: Sheet1
model1	model2	pure_incon_rate	eqaulsplit_incon_rate	IBMsplit_incon_rate	EqualIBMsplit_incon_rate	equalsplit_fix_rate	IBMsplit_fix_rate	EqualIBMsplit_fix_rate
gpt-3.5-turbo	claude-v1	0.875	0.3125	0.3875	0.1625	0.671429	0.542857	0.8
llama-13b	vicuna-13b	0.425	0.1	0.1125	0.05	0.852941	0.794118	0.911765
alpaca-13b	vicuna-13b	0.5375	0.075	0.15	0.05	0.930233	0.813953	0.953488
gpt-3.5-turbo	gpt-4	0.8125	0.2375	0.325	0.175	0.753846	0.692308	0.830769
gpt-4	claude-v1	0.9375	0.6125	0.65	0.4375	0.373333	0.306667	0.546667
vicuna-13b	vicuna-7b	0.825	0.5375	0.4375	0.2625	0.424242	0.378788	0.606061
vicuna-7b	alpaca-13b	0.575	0	0.175	0	0.934783	0.630435	0.956522
gpt-4	vicuna-13b	0.75	0.3125	0.3625	0.2	0.633333	0.55	0.75
