# Supplementary material
Source: ML conference proceedings conference paper supplement (https://aclanthology.org/2024.emnlp-main.621)
Supplement: software [file output_claude2_version_old_temp_0.xlsx]

## Sheet: Sheet1
model1	model2	pure_incon_rate	eqaulsplit_incon_rate	IBMsplit_incon_rate	EqualIBMsplit_incon_rate	equalsplit_fix_rate	IBMsplit_fix_rate	EqualIBMsplit_fix_rate
gpt-3.5-turbo	claude-v1	0.575	0.275	0.45	0.125	0.195652	0.391304	0.521739
llama-13b	vicuna-13b	0.2875	0.35	0.4	0.2375	0.608696	0.565217	0.826087
alpaca-13b	vicuna-13b	0.4875	0.425	0.55	0.3625	0.384615	0.205128	0.435897
gpt-3.5-turbo	gpt-4	0.6125	0.5125	0.6875	0.375	0.346939	0.265306	0.530612
gpt-4	claude-v1	0.6625	0.6125	0.7125	0.5	0.320755	0.245283	0.471698
vicuna-13b	vicuna-7b	0.575	0.5875	0.6125	0.375	0.282609	0.304348	0.5
vicuna-7b	alpaca-13b	0.4875	0.525	0.45	0.3125	0.461538	0.461538	0.641026
gpt-4	vicuna-13b	0.525	0.675	0.7125	0.5	0.214286	0.238095	0.428571
