# Supplementary material
Source: ML conference proceedings conference paper supplement (https://aclanthology.org/2024.emnlp-main.621)
Supplement: software [file output_gpt-3.5-turbo_version_likert_temp_0.xlsx]

## Sheet: Sheet1
model1	model2	pure_incon_rate	eqaulsplit_incon_rate	IBMsplit_incon_rate	EqualIBMsplit_incon_rate	equalsplit_fix_rate	IBMsplit_fix_rate	EqualIBMsplit_fix_rate
gpt-3.5-turbo	claude-v1	0.3	0.025	0.0125	0.0125	0.916667	0.958333	0.958333
llama-13b	vicuna-13b	0.05	0.0375	0.025	0.0125	1	0.75	1
alpaca-13b	vicuna-13b	0.05	0.0125	0	0	1	1	1
gpt-3.5-turbo	gpt-4	0.3	0.0375	0.025	0.0125	0.875	0.958333	0.958333
gpt-4	claude-v1	0.4375	0.075	0.1125	0.025	0.828571	0.828571	0.942857
vicuna-13b	vicuna-7b	0.2125	0.025	0.0125	0	0.882353	1	1
vicuna-7b	alpaca-13b	0.0125	0	0	0	1	1	1
gpt-4	vicuna-13b	0.325	0.1	0.1	0.05	0.692308	0.769231	0.846154
