# Supplementary material
Source: ML conference proceedings conference paper supplement (https://aclanthology.org/2024.emnlp-main.621)
Supplement: software [file output_gpt-3.5-turbo_version_new_temp_0.xlsx]

## Sheet: Sheet1
model1	model2	pure_incon_rate	eqaulsplit_incon_rate	IBMsplit_incon_rate	EqualIBMsplit_incon_rate	equalsplit_fix_rate	IBMsplit_fix_rate	EqualIBMsplit_fix_rate
gpt-3.5-turbo	claude-v1	0.1875	0.2125	0.3	0.1375	0.533333	0.266667	0.666667
llama-13b	vicuna-13b	0.0875	0.0625	0.1625	0.0625	0.571429	0.285714	0.571429
alpaca-13b	vicuna-13b	0.075	0.0875	0.0875	0.025	0.333333	0.666667	0.666667
gpt-3.5-turbo	gpt-4	0.2125	0.1375	0.2625	0.1	0.588235	0.529412	0.705882
gpt-4	claude-v1	0.425	0.375	0.4125	0.2375	0.5	0.5	0.647059
vicuna-13b	vicuna-7b	0.5	0.325	0.5125	0.2	0.6	0.375	0.75
vicuna-7b	alpaca-13b	0.0875	0.0625	0.075	0.025	0.714286	0.571429	1
gpt-4	vicuna-13b	0.175	0.15	0.2625	0.125	0.571429	0.285714	0.642857
