# Supplementary material
Source: ML conference proceedings conference paper supplement (https://aclanthology.org/2024.emnlp-main.621)
Supplement: software [file output_qwen_version_likert_temp_0.xlsx]

## Sheet: Sheet1
model1	model2	pure_incon_rate	eqaulsplit_incon_rate	IBMsplit_incon_rate	EqualIBMsplit_incon_rate	equalsplit_fix_rate	IBMsplit_fix_rate	EqualIBMsplit_fix_rate
gpt-3.5-turbo	claude-v1	0.9625	0.9625	0.9625	0.9375	0.038961	0.025974	0.0649351
llama-13b	vicuna-13b	0.8875	0.975	0.975	0.95	0.028169	0.0140845	0.0422535
alpaca-13b	vicuna-13b	0.9125	0.975	0.9625	0.9375	0.0273973	0.0410959	0.0684932
gpt-3.5-turbo	gpt-4	0.925	0.9125	0.95	0.8875	0.0540541	0.0540541	0.0810811
gpt-4	claude-v1	0.9125	0.9375	0.875	0.85	0.0136986	0.0547945	0.0547945
vicuna-13b	vicuna-7b	0.9625	0.975	0.925	0.9125	0.012987	0.0519481	0.0649351
vicuna-7b	alpaca-13b	0.9	0.9625	0.95	0.9375	0.0277778	0.0416667	0.0555556
gpt-4	vicuna-13b	0.8875	0.8625	0.925	0.8375	0.0704225	0.028169	0.084507
