# Supplementary material
Source: ML conference proceedings conference paper supplement (https://aclanthology.org/2024.emnlp-main.621)
Supplement: software [file output_qwen_version_new_temp_0.xlsx]

## Sheet: Sheet1
model1	model2	pure_incon_rate	eqaulsplit_incon_rate	IBMsplit_incon_rate	EqualIBMsplit_incon_rate	equalsplit_fix_rate	IBMsplit_fix_rate	EqualIBMsplit_fix_rate
gpt-3.5-turbo	claude-v1	0.4125	0.4625	0.3625	0.2625	0.363636	0.333333	0.545455
llama-13b	vicuna-13b	0.15	0.175	0.15	0.0875	0.666667	0.75	0.833333
alpaca-13b	vicuna-13b	0.25	0.275	0.25	0.1375	0.5	0.55	0.7
gpt-3.5-turbo	gpt-4	0.4	0.3375	0.3375	0.175	0.40625	0.53125	0.65625
gpt-4	claude-v1	0.5625	0.4125	0.4	0.175	0.533333	0.488889	0.8
vicuna-13b	vicuna-7b	0.4625	0.6	0.5	0.4	0.189189	0.378378	0.459459
vicuna-7b	alpaca-13b	0.2625	0.35	0.375	0.2625	0.571429	0.47619	0.619048
gpt-4	vicuna-13b	0.45	0.3625	0.425	0.25	0.5	0.444444	0.638889
