# Supplementary material
Source: ML conference proceedings conference paper supplement (https://aclanthology.org/2024.emnlp-main.621)
Supplement: software [file output_qwen_version_old_temp_0.xlsx]

## Sheet: Sheet1
model1	model2	pure_incon_rate	eqaulsplit_incon_rate	IBMsplit_incon_rate	EqualIBMsplit_incon_rate	equalsplit_fix_rate	IBMsplit_fix_rate	EqualIBMsplit_fix_rate
gpt-3.5-turbo	claude-v1	0.5375	0.475	0.5875	0.3375	0.395349	0.27907	0.511628
llama-13b	vicuna-13b	0.4625	0.4375	0.2875	0.2375	0.351351	0.513514	0.567568
alpaca-13b	vicuna-13b	0.4625	0.4375	0.3	0.225	0.567568	0.648649	0.756757
gpt-3.5-turbo	gpt-4	0.5	0.3875	0.4375	0.2375	0.45	0.425	0.575
gpt-4	claude-v1	0.5625	0.5375	0.4375	0.275	0.311111	0.4	0.577778
vicuna-13b	vicuna-7b	0.4375	0.65	0.5	0.45	0.228571	0.4	0.514286
vicuna-7b	alpaca-13b	0.425	0.425	0.3625	0.2875	0.352941	0.411765	0.529412
gpt-4	vicuna-13b	0.4	0.4625	0.4125	0.2625	0.5	0.65625	0.75
